# Supplementary material
Source: PubMed Central journal article supplement (PMC3143593)
Supplement: supp_M111.241315_jbc.M111.241315-1.pdf [file supp_M111.241315_jbc.M111.241315-1.pdf]

Ghilarov et al., Supplementary data.

Supplementary figure legends.

**Supplementary figure S1. Detection of X-type McB in producing *E. coli* cells.**

**A.** Direct MALDI-MS analysis of *E. coli* cells producing McB. See Experimental Procedures for details.

**B.** MS-MS analysis of  $m/z=3094$  mass-ion corresponding to McB  $\Delta 0$  from the spectrum, shown in panel A.

**Supplementary figure S2. N-type McB  $\Delta 0$  remains unchanged during standard purification.**

Pure N-type McB  $\Delta 0$  (analyzed by reverse phase HPLC at the top panel) was mock purified by the standard McB purification procedure (see Experimental Procedures) and re-analyzed by HPLC (bottom panel).

**Supplementary figure S3. HPLC analysis of X-type McB  $\Delta 0$ .**

The starting material shown at the top panel was incubated overnight at room temperature in pH 7.4 buffer prior to HPLC analysis (bottom panel).

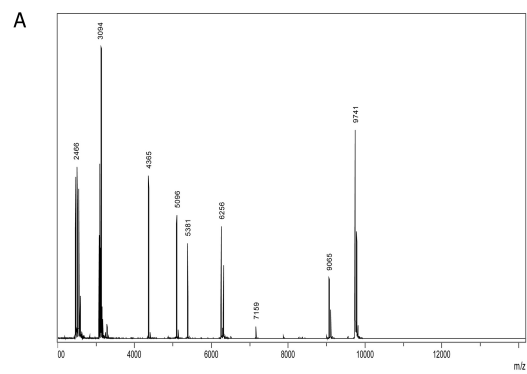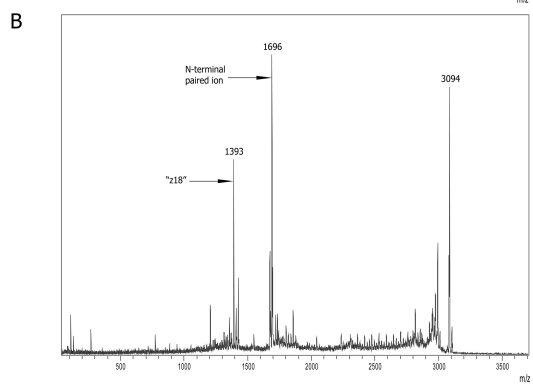

**Supplementary figure 1**

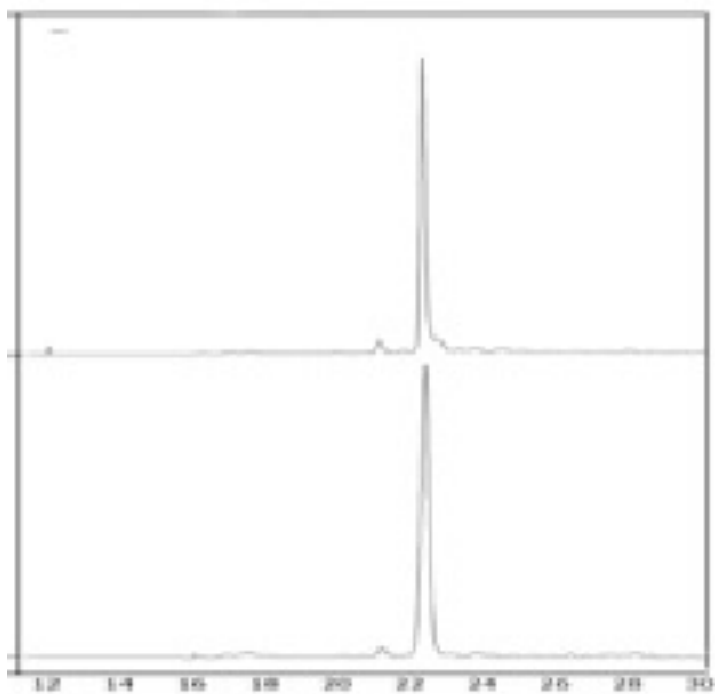

**Supplementary Fig. 2**

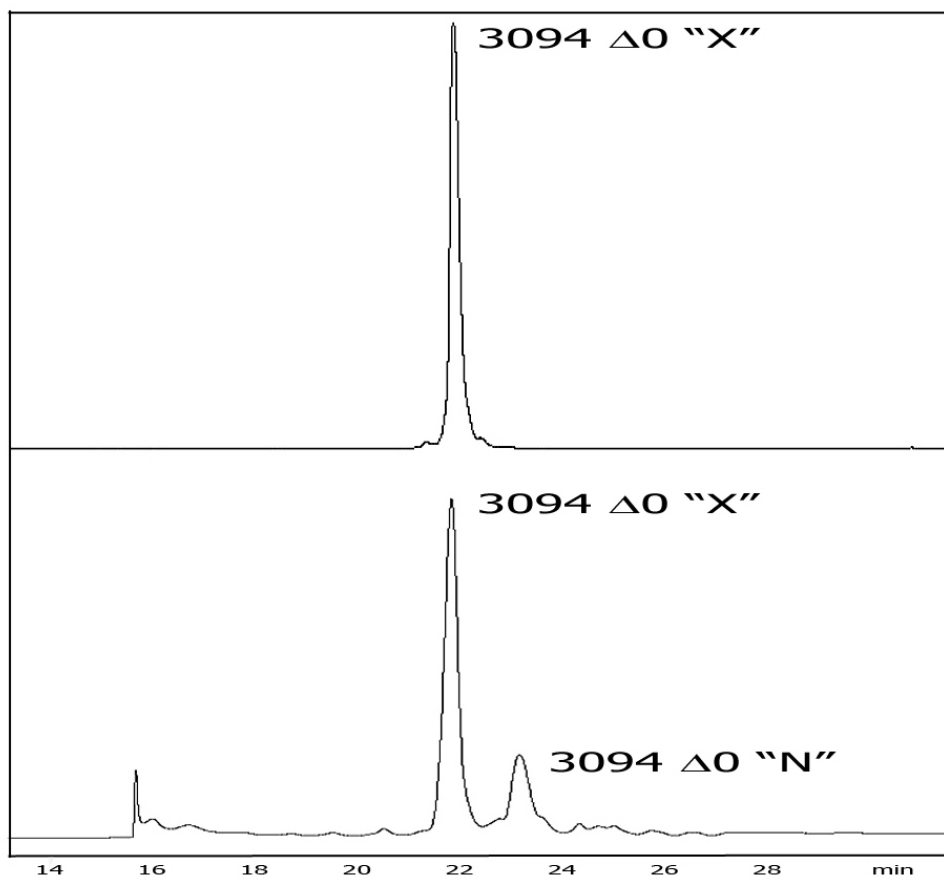

Supplementary Fig. 3
